# Supplementary material for: Improving model predictions for RNA interference activities that use support vector machine regression by combining and filtering features
Source: PubMed Central journal article supplement (PMC1906837; doi:10.1186/1471-2105-8-182), 2007-06-06

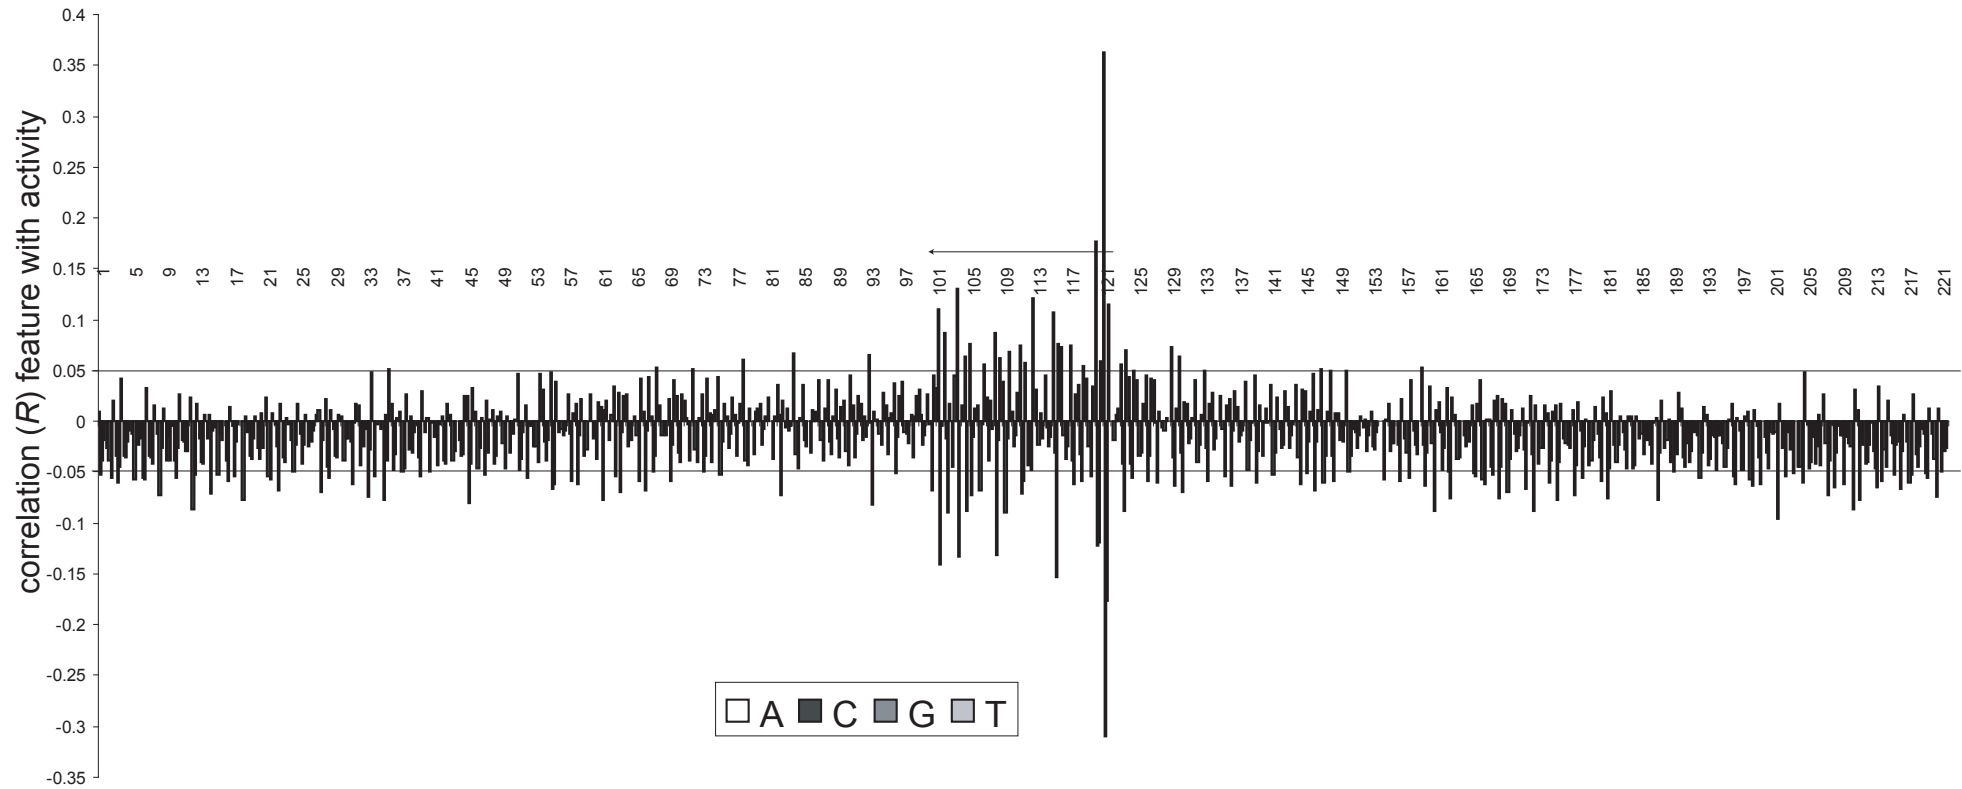

Supplement: 1471-2105-8-182-S3.pdf [file 1471-2105-8-182-S3.pdf]
